# Supplementary material for: Trypanosome diversity in small mammals in Uganda and the spread of Trypanosoma lewisi to native species
Source: PubMed Central journal article supplement (PMC10724337; doi:10.1007/s00436-023-08048-2), 2023-12-16
Supplement: 436_2023_8048_MOESM1_ESM.pdf [file 436_2023_8048_MOESM1_ESM.pdf]

*T. grosi* SESUJI (RUS, *Apodemus*), AB175622

*T. grosi* HANTO (RUS, *Apodemus*), AB175623

AF05j (TZN, *Aethomys*), MZ703224

*T. blanchardi* (FRA, *Eliomys*), AY491764

*T. musculi* (? , *Mus*), AJ223568

*T. niviventerae* (CHN, *Niviventer*), AB242274

*T. rabinowitschae* (FRA, *Cricetus*), AY491765

AF05m\_UGA0797(UGA0664) (UGA, *Mus bufo*), OR452745 (ASI NEEXISTUJE)

AF05f\_UGA0732\_UGA0795\_UGA0898\_UGA0991\_UGA1017 (UGA, *Praomys jacksoni*), OR668942

AF05f (TZN, *Praomys*), MZ703220

AF05e (ZMB, *Praomys*), MZ703219

AF05a\_UGA0355\_UGA0393\_UGA0428\_UGA0511\_UGA0514 (UGA, *Praomys jacksoni* + *Mus bufo*), OR668939-40

AF05a (KEN, *Praomys*+*Acomys*), MZ703215

AF05l\_UGA0541 (UGA, *Hylomyscus denniae* + *H. kerbispeterhansi*), OR452744

AF05p\_UGA0730 (UGA, *Crocidura* sp.), OR668946

AF05o\_UGA0724 (UGA, *Mus bufo*), OR668945

AF05n\_UGA1096 (UGA, *Hylomyscus denniae*), OR452746

AF05i (KEN+TZN, *Mastomys*+*Acomys*), MZ703223

AF05i\_UGA0269 (UGA, *Acomys wilsoni*), OR668944

AF05h (CAR+ETH, *Rattus*+*Acomys*), MZ703222

*T. cf. lewisi* (BRA, *Rattus*+*Aoutus*+*Alouatta*+*Callithrix*), GU252209

AF05d (TZN, *Mus*), MZ703218

AF05b\_UGA0495\_UGA0551\_UGA0664\_UGA0724\_UGA0885\_UGA0918 (UGA, *Mus bufo* + *M. triton* + *Rattus rattus*), OR668941

AF05b (ETH+KEN+TZA, *Rattus*+*Aethomys*+*Dendromys*+*Desmomys*+*Grammomys*+*Mastomys*+*Mus*+*Stenocephalemys*), MZ703216

*T. lewisi* (USA, *Rattus norvegicus*), AJ223566

*T. lewisi* (GBR, *Rattus* sp.), AJ009156

*T. lewisi* (IDN, *Bandicota indica*), AB242273

AF05c (ETH, *Stenocephalemys*+*Lophuromys*), MZ703217

AF05k\_UGA0334 (UGA, *Mus bufo*), OR452743

AF05g (KEN+TZN, *Lemniscomys*+*Mus*), MZ703221

AF05g\_UGA0332 (UGA, *Lophuromys stanleyi*), OR668943

0.0007
