# Supplementary material for: Trypanosome diversity in small mammals in Uganda and the spread of Trypanosoma lewisi to native species
Source: PubMed Central journal article supplement (PMC10724337; doi:10.1007/s00436-023-08048-2), 2023-12-16

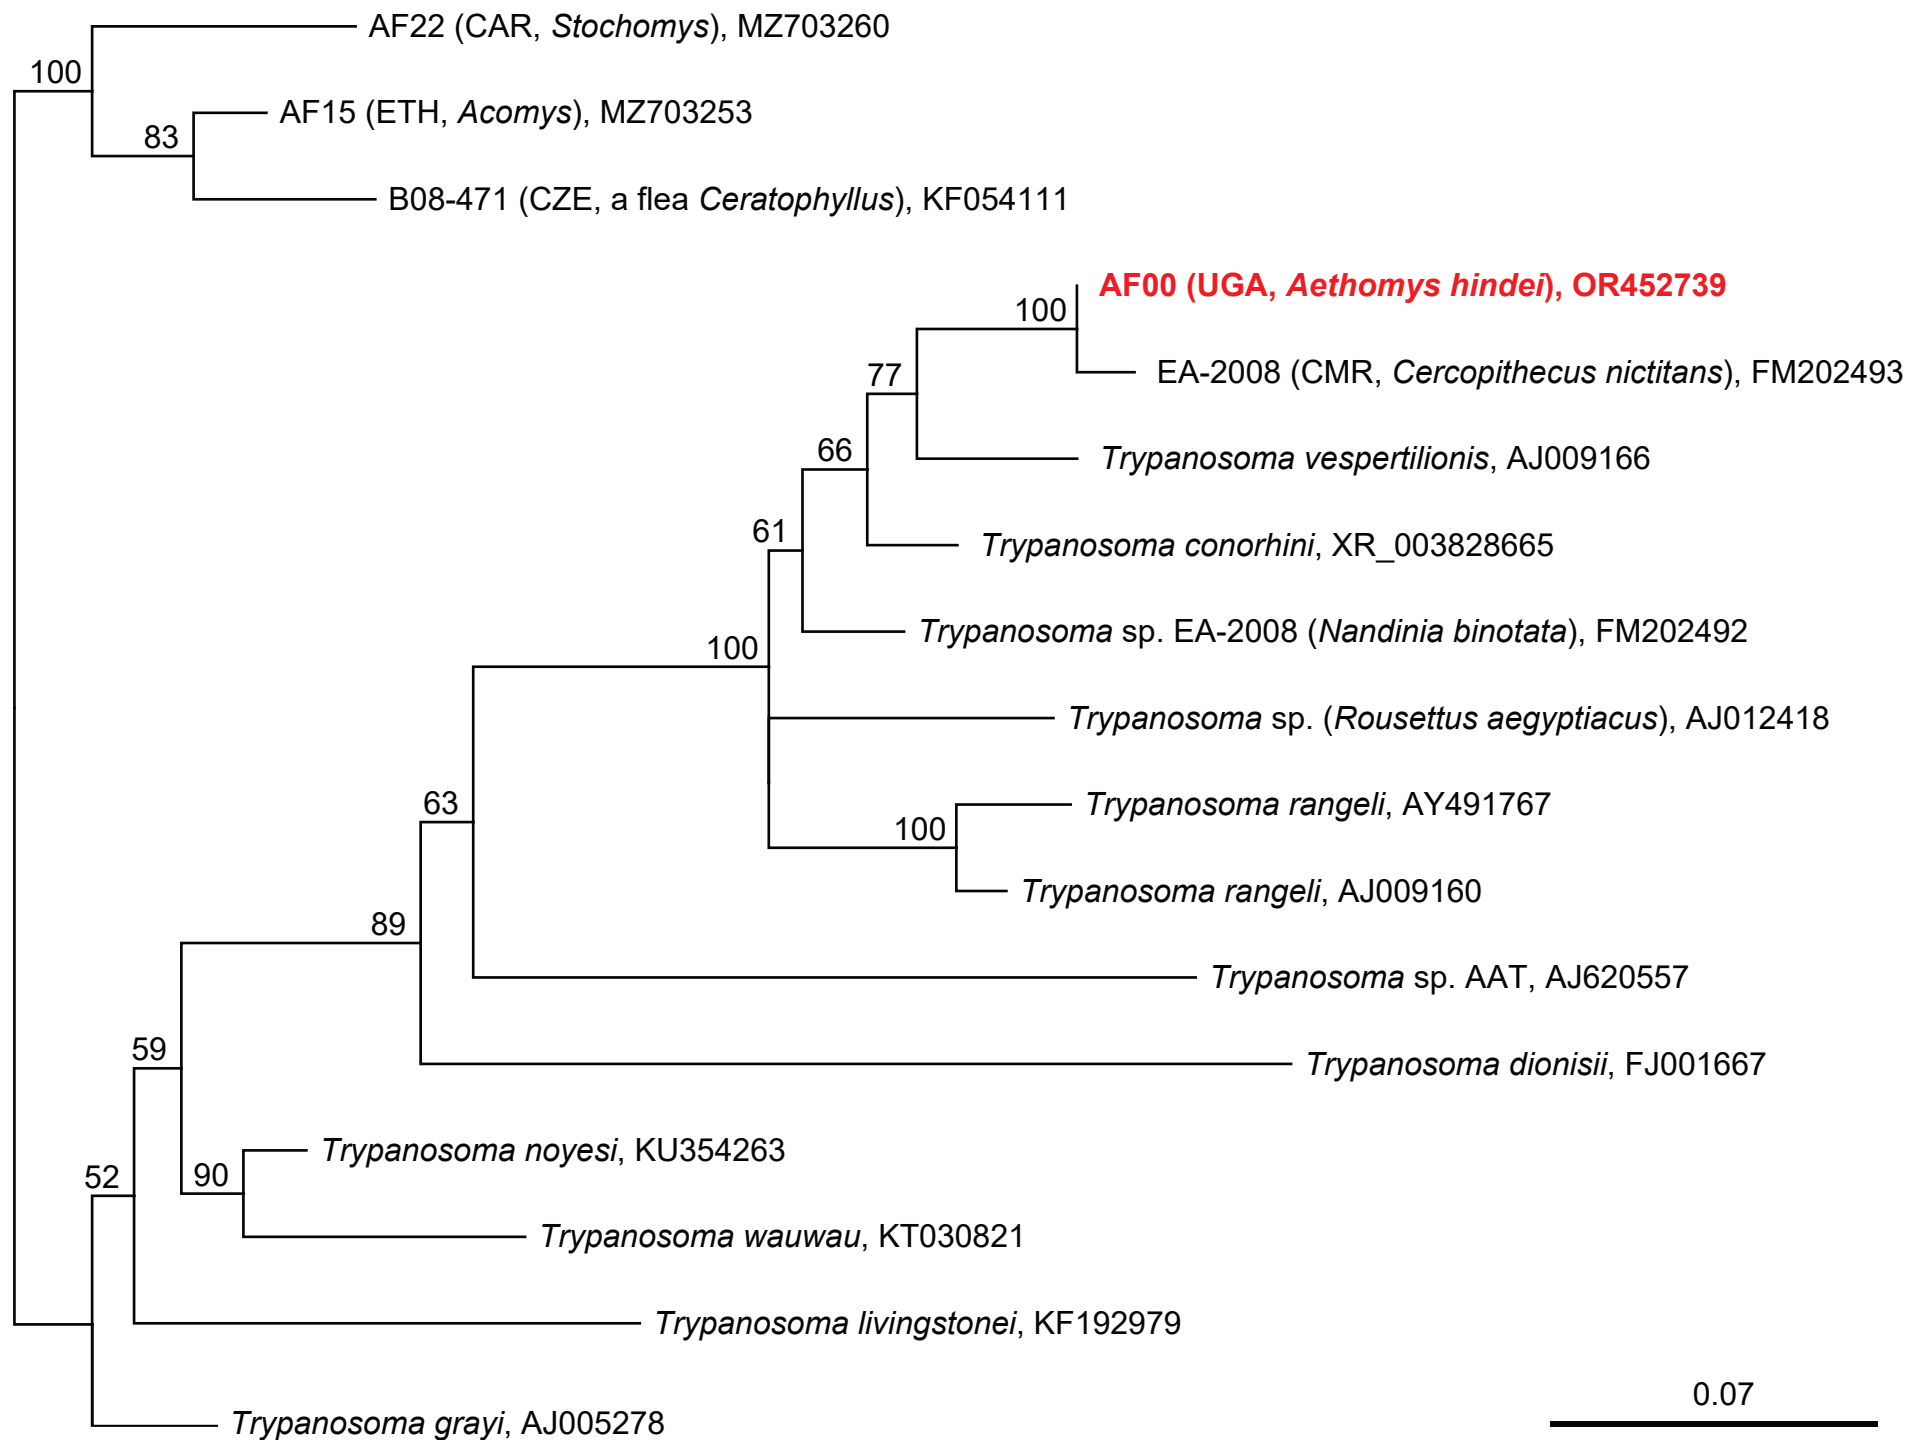

Supplement: 436_2023_8048_MOESM2_ESM.pdf [file 436_2023_8048_MOESM2_ESM.pdf]
